# Supplementary material for: Transcriptional and functional regulation of cell cycle and UV response by PPARβ in human skin epidermal cells
Source: PubMed Central journal article supplement — FASEB J. 2024 Dec 2;38(23):e70212. doi: 10.1096/fj.202401950R (PMC11610672; doi:10.1096/fj.202401950r), 2024-12-02
Supplement: FSB2-38-e70212-s001.pdf [file FSB2-38-e70212-s001.pdf]

## SCC12

**a**

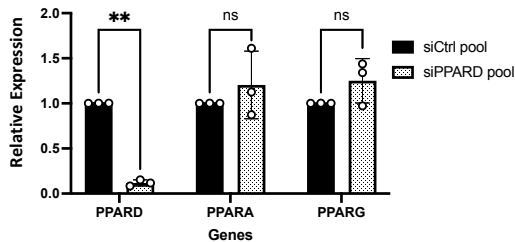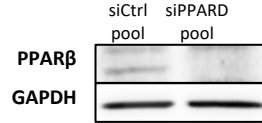

**b**

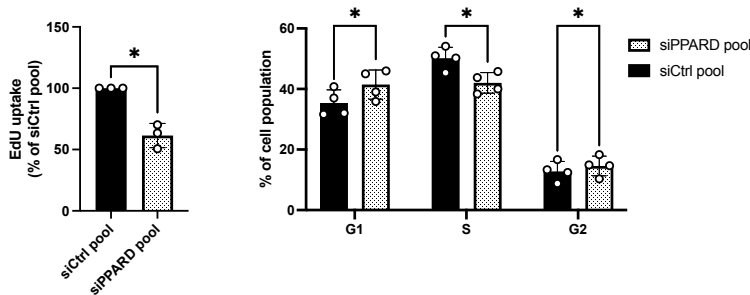

**Figure S2. Impact of PPAR $\beta$  depletion on cell proliferation and cell cycle progression in the malignant human keratinocyte SCC12 cell line.**

(a) Left panel: expression of PPAR $\beta$ , PPAR $\alpha$  and PPAR $\gamma$  at mRNA (qPCR) levels in control (siCtrl pool) and PPAR $\beta$ -depleted (siPPARD pool; a pool of 4 different siPPARD) in SCC12 cells, 72h following siRNA transfection. Right panel: expression of PPAR $\beta$  at the protein level (western blot) in control (siCtrl pool) and PPAR $\beta$ -depleted (siPPARD pool) in SCC12 cells, 72h following siRNA transfection. GAPDH has been used as loading control for western blots. (b) Cell proliferation quantified using EdU uptake (left panel) and FACS analysis of the cell cycle progression (right panel) in SCC12 cells, 72 hours after transfection with control (siCtrl) or a pool of 4 different siPPARD (siPPARD pool). Bars represent mean  $\pm$  standard deviation from at least three independent biological replicates (white circles), each with three technical replicates. (\*\*,  $p < 0.01$ ; \*,  $p < 0.05$ , two-tailed Student's  $t$  test)
