# Supplementary material for: Transcriptional and functional regulation of cell cycle and UV response by PPARβ in human skin epidermal cells
Source: PubMed Central journal article supplement — FASEB J. 2024 Dec 2;38(23):e70212. doi: 10.1096/fj.202401950R (PMC11610672; doi:10.1096/fj.202401950r), 2024-12-02
Supplement: FSB2-38-e70212-s002.pdf [file FSB2-38-e70212-s002.pdf]

**a****NHEK**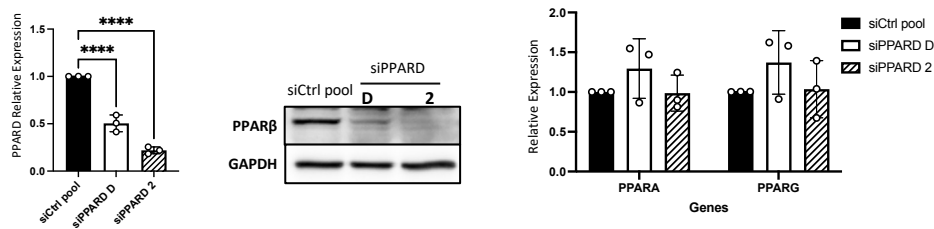**b****SCC13**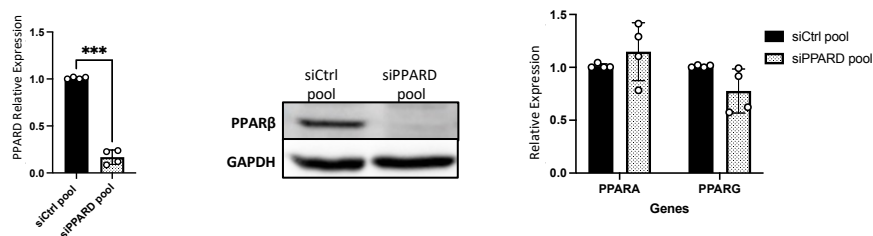**A375**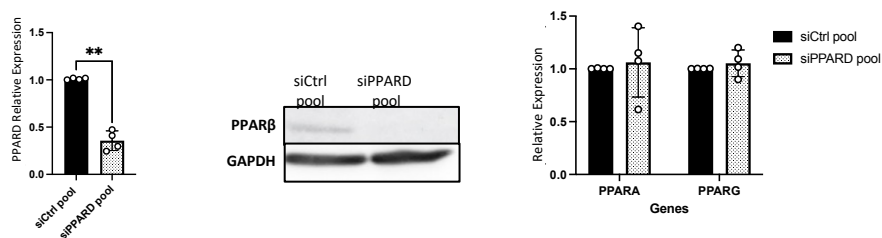

**Figure S1. PPAR $\alpha$ , PPAR $\beta$  and PPAR $\gamma$  expression levels in normal and malignant human epidermal cells.** (a) Left and middle panels: PPAR $\beta$  expression at mRNA (left, qPCR) and protein (middle, western blot) levels in control (siCtrl pool) and PPAR $\beta$ -depleted (siPPARD D, siPPARD 2) NHEK cells, 72h following siRNA transfection. Right panel: expression of PPAR $\alpha$  (PPARA gene) and PPAR $\gamma$  (PPARG gene) at mRNA (qPCR) levels in control (siCtrl pool) and PPAR $\beta$ -depleted (siPPARD D, siPPARD 2) NHEK cells, 72h following siRNA transfection. (b) Left and middle panels: PPAR $\beta$  expression at mRNA (left, qPCR) and protein (middle, western blot) levels in control (siCtrl pool) and PPAR $\beta$ -depleted (siPPARD D pool) SCC13 and A375 cells (upper panel and lower panel), 72h following siRNA transfection. Right panels: expression of PPAR $\alpha$  and PPAR $\gamma$  at mRNA (qPCR) levels in control (siCtrl pool) and PPAR $\beta$ -depleted (siPPARD pool) SCC13 and A375 cells (upper panel and lower panel), 72h following siRNA transfection. GAPDH has been used as loading control for western blots. Bars represent mean  $\pm$  standard deviation from at least three independent biological replicates (white circles), each with three technical replicates. (\*\*\*\*,  $p < 0.0001$ ; \*\*\*,  $p < 0.001$ ; \*\*,  $p < 0.01$ , two-tailed Student's  $t$  test for two group comparisons, and one-way ANOVA with Dunnett's multiple-comparison test for more than two group comparisons).
