# Supplementary material for: Transcriptional and functional regulation of cell cycle and UV response by PPARβ in human skin epidermal cells
Source: PubMed Central journal article supplement — FASEB J. 2024 Dec 2;38(23):e70212. doi: 10.1096/fj.202401950R (PMC11610672; doi:10.1096/fj.202401950r), 2024-12-02
Supplement: FSB2-38-e70212-s003.pdf [file FSB2-38-e70212-s003.pdf]

NHEK

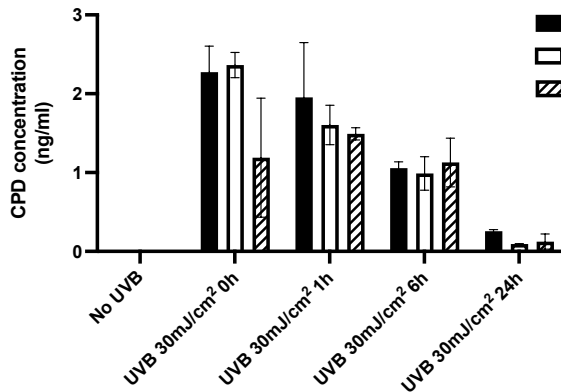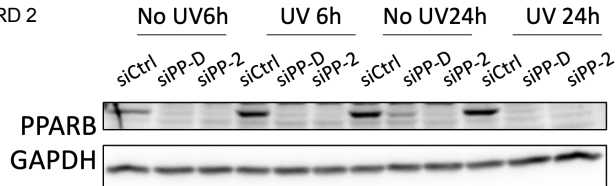

### **Figure S3. Kinetics of CPD induction and clearance following UVB exposure**

Concentration of CPDs in control (siCtrl pool) and PPAR $\beta$ -depleted (siPPARD D, siPPARD 2) NHEK cells at different timepoints following UVB exposure (30mJ/cm<sup>2</sup>; n=2) (Left). PPAR $\beta$  levels at different timepoints after UVB irradiation and CPD formation (right).
